# Supplementary material
Source: Research Square preprint supplement (doi:10.21203/rs.3.rs-9041181/v1)
Supplement: Supplementary file 1 [file 56c20f89753649af12de1700.docx]

Table S1. Characteristics of participants in the Group Model Building workshop (n = 18).

| **Characteristic** | **Category** | **n (%)** |
| --- | --- | --- |
| **Participant group** | External experts | 11 (61.1) |
|  | Project team members | 7 (38.9) |
| **Primary disciplinary area*** | Architecture / Urban planning | 5 (27.8) |
|  | Public health / Physical activity and health | 6 (33.3) |
|  | Geography / Spatial studies | 1 (5.6) |
|  | Social policy / Governance | 3 (16.7) |
|  | Nutrition / Food systems | 1 (5.6) |
|  | Interdisciplinary / Other | 2 (11.1) |
| **Primary sector*** | Academia / Research institutions | 13 (72.2) |
|  | Government / Public sector | 3 (16.7) |
|  | Civil society / NGOs / Community practice | 1 (5.6) |
|  | Private sector / Consultancy | 1 (5.6) |
| **City of institutional affiliation (Brazil)** | São Paulo | 8 (44.4) |
|  | Curitiba | 5 (27.8) |
|  | Londrina | 2 (11.1) |
|  | Other / International collaboration (U.S.) | 3 (16.7) |
| **Career stage*** | Early career (students / research assistants) | 5 (27.8) |
|  | Mid-career professionals | 8 (44.4) |
|  | Senior researchers / professionals | 5 (27.8) |
| **Gender*** | Women | 13 (72.2) |
|  | Men | 5 (27.8) |
|  | Not reported / Prefer not to say | 0 (0) |
