# Supplementary material
Source: Research Square preprint supplement (doi:10.21203/rs.3.rs-9041181/v1)
Supplement: Supplementary file 2 [file 72e3746887e2cfa88a1a651a.docx]

### Table S2. Summary of feedback loops in the CLD

| **Loop** | **Core variables (examples)** | **Expected system effect** | **Practical leverage points (examples)** |
| --- | --- | --- | --- |
| Resilient Housing and Well-Being | Resilient housing quality & environmental comfort; mental health; physical health; demand for resilient standards; investment | Health gains + stronger momentum for resilient housing improvements | Embed thermal comfort and hazard-ready standards; maintenance funding; enforce performance-based specs |
| Adaptive Urban Design and Active Mobility | Adaptive urban design coverage; vegetation/greening; safe parks/plazas; active-mobility infrastructure; physical activity; air pollution; social cohesion | More physical activity + improved environmental quality and cohesion | Nature-based solutions; shade trees; continuous sidewalks; safe public spaces; protected cycling |
| Policy Integration and Institutional Learning | Social participation; public pressure; implementation of climate-oriented policies; resilient housing policy implementation; adaptive capacity; public trust | More effective cross-sector action and sustained policy execution | Formal participatory governance; co-management; interministerial coordination; joint criteria and monitoring |
| Socioeconomic Inequality and Exposure | Income inequality by race and gender; access to secure/well-located housing; exposure to hazards; resources; health risks | Dampens gains; maintains vulnerability | Equity-focused targeting; anti-segregation siting; prioritize services and protections for highest-risk groups |
| Market Pressure and Peripheralization | Land cost; market pressure/speculation; location of housing developments; access to services; exposure to hazards | Reinforces spatial disadvantage and risk | Land policy tools; siting requirements; transit-oriented location; service guarantees; anti-peripheralization safeguards |
| Urban Violence and Behavioral Constraint | Safety/violence; use of public space; leisure-time physical activity; social cohesion | Suppresses active living and community benefits | Violence prevention; lighting; inclusive design; activation/maintenance; community stewardship; safe routes |
